# Supplementary material for: MinION Sequencing of Yeast Mock Communities To Assess the Effect of Databases and ITS-LSU Markers on the Reliability of Metabarcoding Analysis
Source: PubMed Central journal article supplement (PMC9927109; doi:10.1128/spectrum.01052-22), 2022-12-15
Supplement: spectrum.01052-22-s0001.pdf [file spectrum.01052-22-s0001.pdf]

**Supplementary Figure 1. Comparison of fungal diversity of mock communities at genus level, obtained with MinION and Illumina MiSeq, considering full libraries (ITS).**

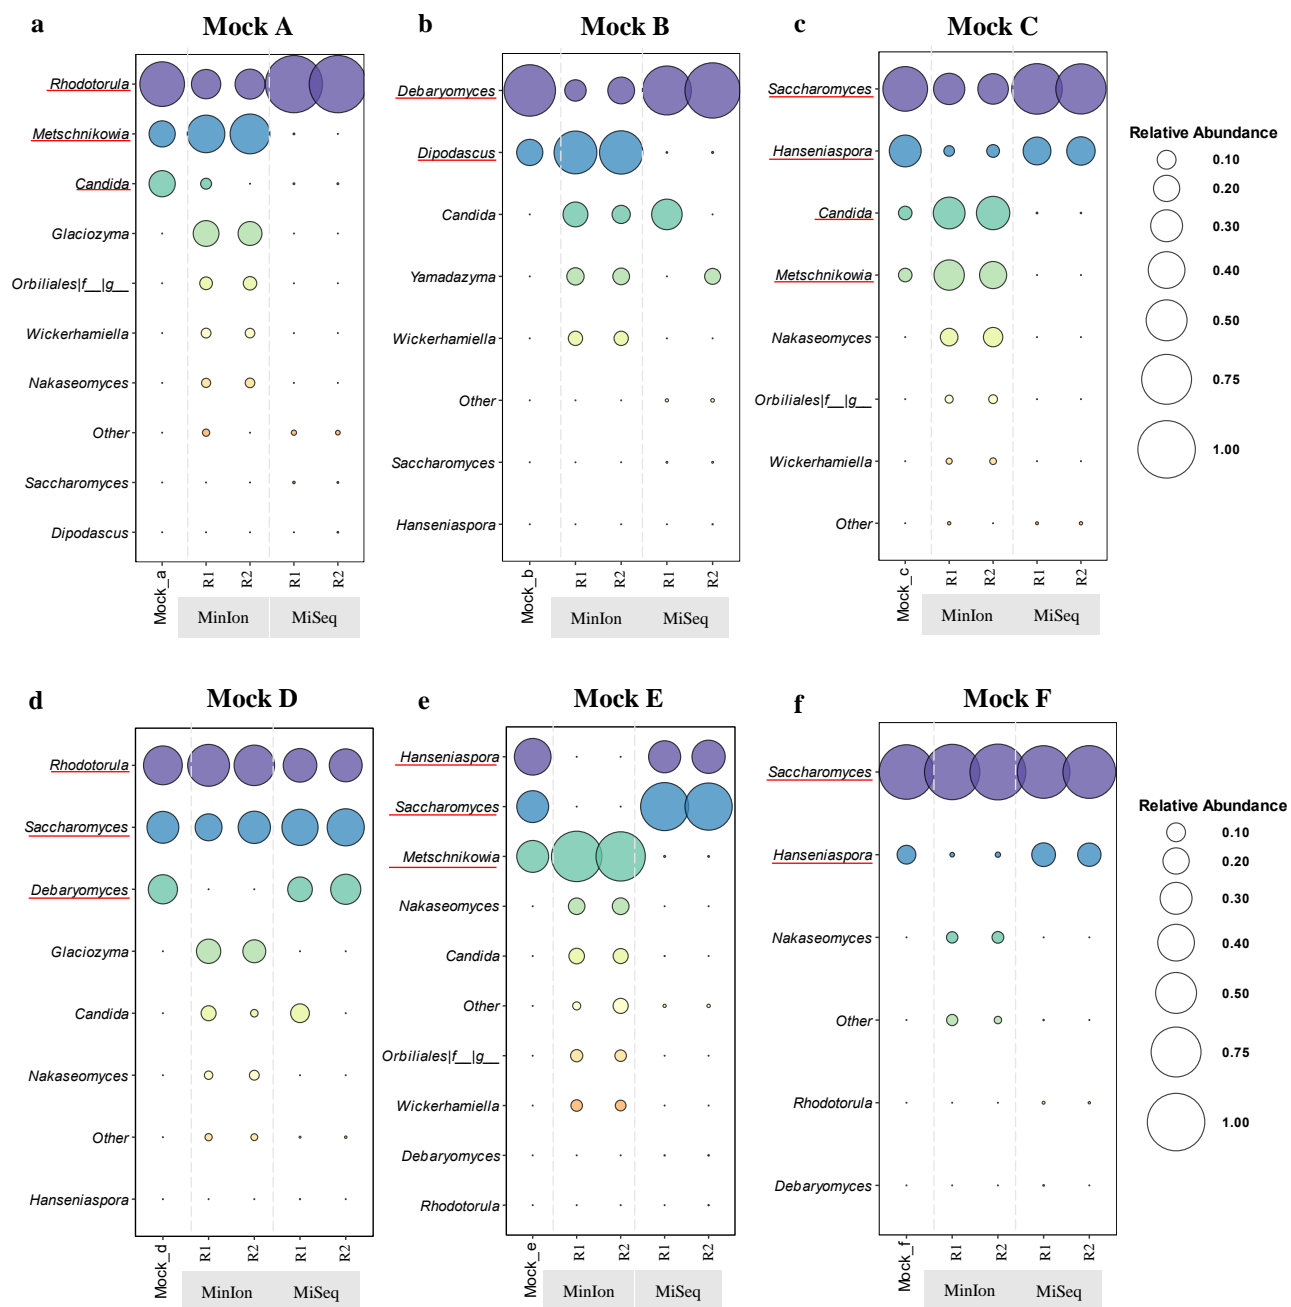

Each panel shows the abundance of genera found within a mock community, expressed with circles of different magnitude that increase proportionally with the increase of relative abundance from 0 to 1.

The library used for the mapping is composed only of ITS sequences, in order to compare the two different sequencing methods.

For each mock, the results are summarized in five columns. The left-most column of each panel represents the supposed abundance present in the mock, the following two columns represent the two biological replicates (labelled with R1 and R2) obtained with MinION while the last two are those obtained with MiSeq.

**Supplementary Figure 2. Comparison of the performance of MinION and MiSeq, at genus level, with a qualitative and a quantitative approach, considering a full ITS library.**

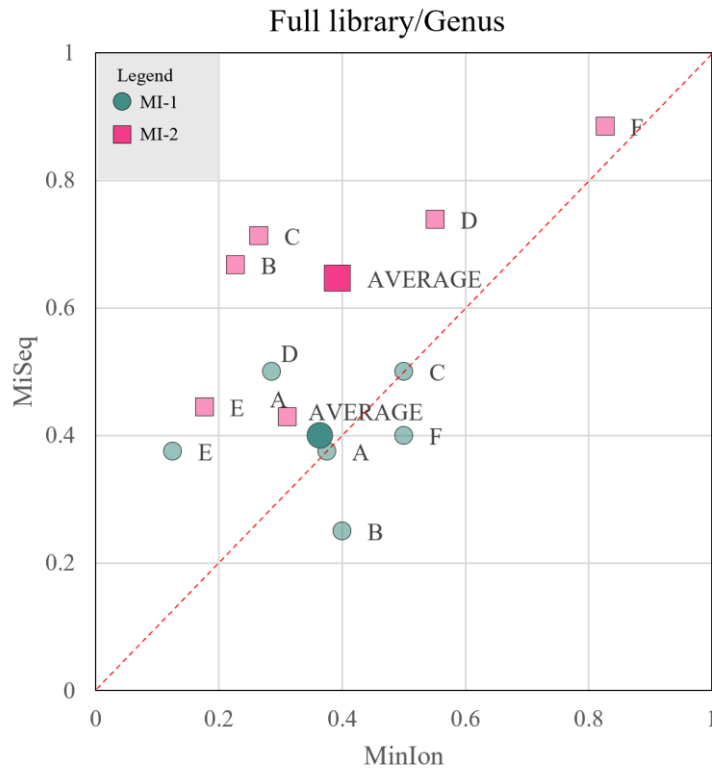

*In order to compare the performance of the two sequencing platforms, two scores were developed to evaluate the matching of estimated and observed values from both a qualitative (MI-1, in pink squares) and quantitative (MI-2, in dark blue-green circles) viewpoint.*

*Each mock (labelled with the letters A, B, C, D, E and F) is characterized by the two scores calculated, at the genus level, both for MinION (x-axis) and MiSeq (y-axis), considering a full ITS library. The average value for each score, obtained considering all mocks, is characterized by a bigger marker.*

**Supplementary Figure 3. UNITE library reference sequences length distribution.**

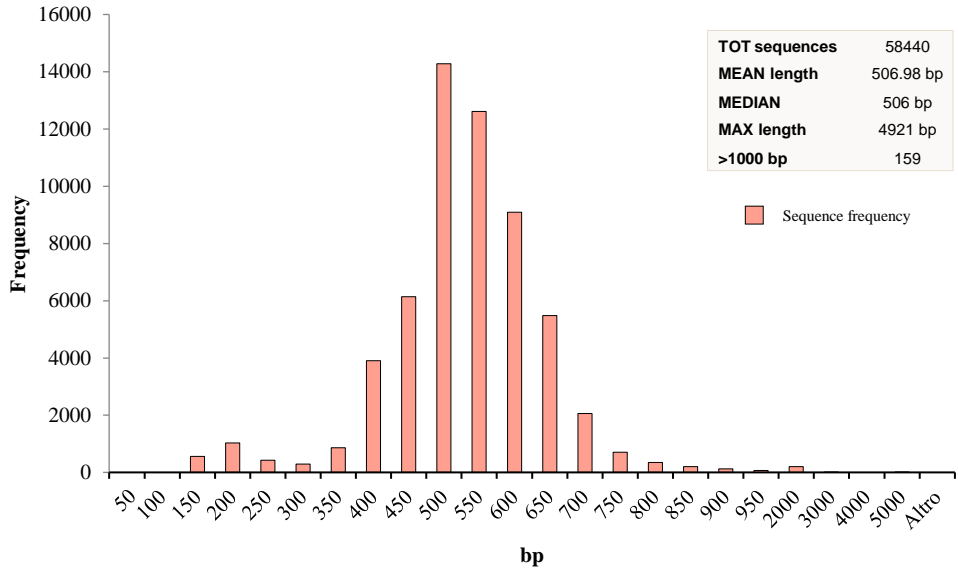

*The distribution of reference sequences length spans from 150 to 5000 bp. In the box, the total number of sequences, mean, median and maximum length are also presented.*

**Supplementary Figure 4. Phylogenetic tree of UNITE reference sequences**

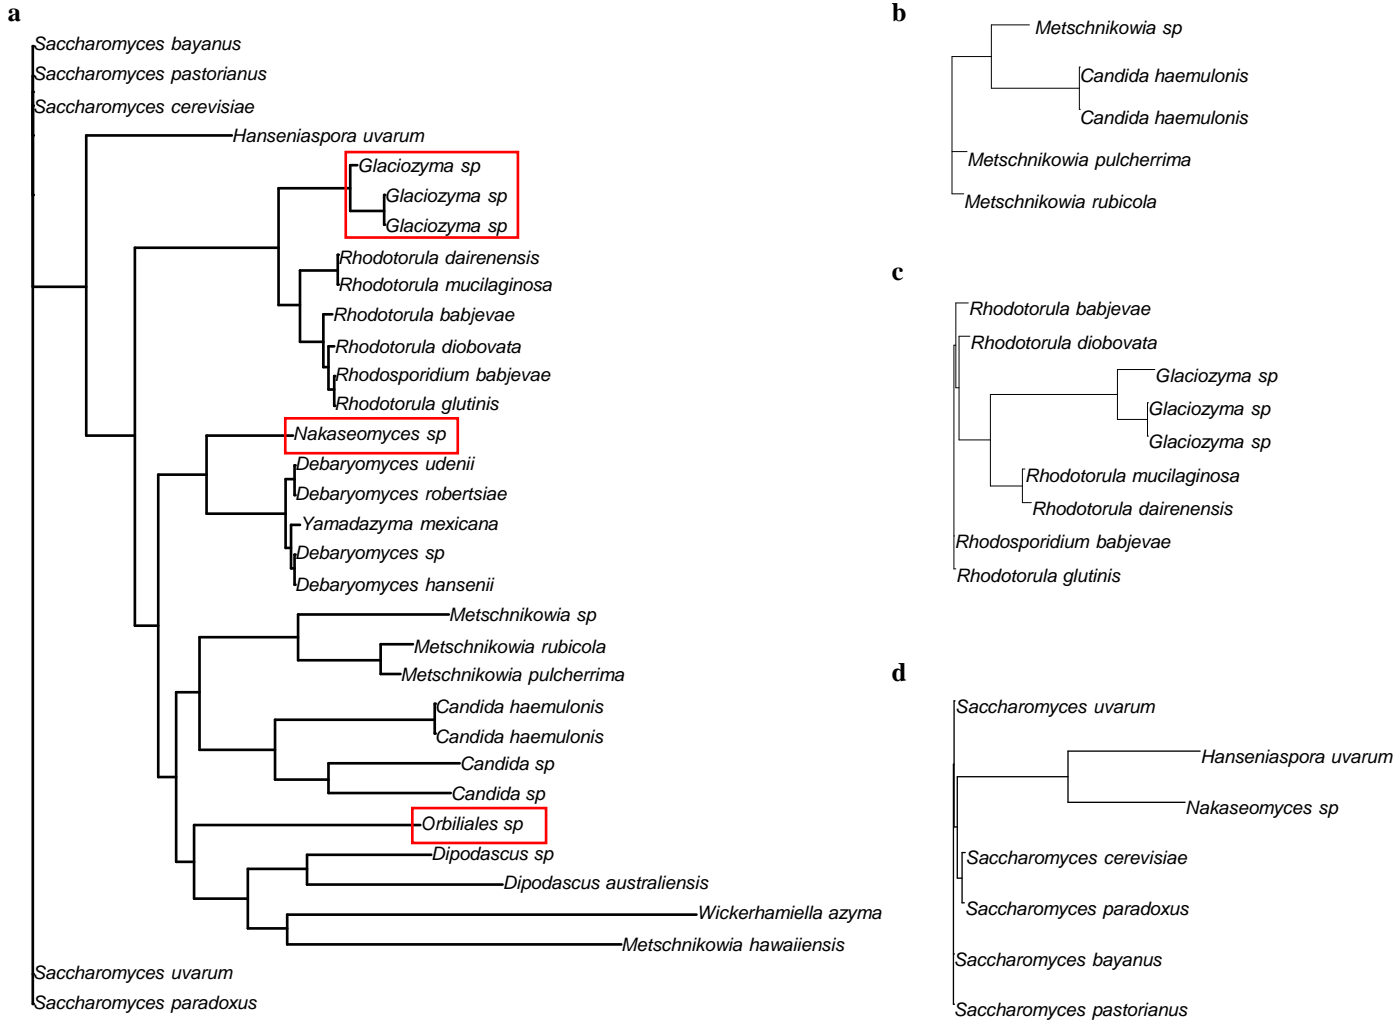

Phylogenetic relationships among organisms identified with full databases. Panel a shows a comprehensive tree of all detected species while panels b, c and d are restricted to one genus.

**Supplementary Figure 5. Comparison of the performance of MinION and MiSeq, at species level, with a qualitative and a quantitative approach, considering a dedicated library.**

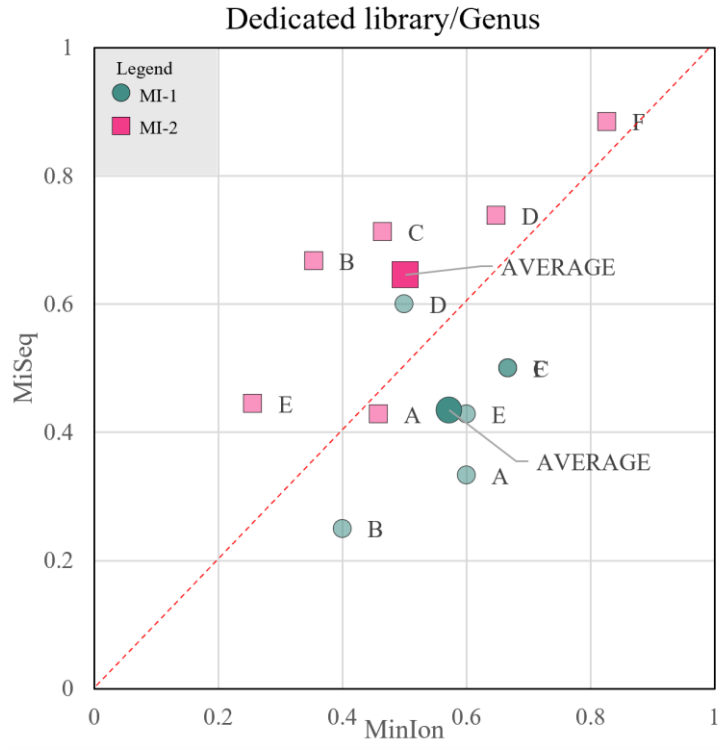

*In order to compare the performance of the two sequencing platforms, two scores were developed to evaluate the matching of estimated and observed values from both a qualitative (MI-1, in pink squares) and quantitative (MI-2, in dark blue-green circles) viewpoint.*

*Each mock (labelled with the letters A, B, C, D, E and F) is characterized by the two scores calculated, at the genus level, both for MinION (x-axis) and MiSeq (y-axis), after the second step of mapping against a dedicated library. The average value for each score, obtained considering all mocks, is characterized by a bigger marker.*

***Supplementary Figure 6. Fungal diversity of mock communities considering dedicated libraries.***

*Each panel shows the abundance (y-axis) of species found within a mock community, obtained by mapping the sequences against a dedicated library after the first identification process against the full library. Both ITS and LSU barcodes from the CBS library were considered. For each barcode there are two columns that represent the two biological replicates (labelled with R1 and R2). The right-most column of each panel represents the mock expected abundance. Species present in the mock community are written in red, while the black ones are those identified by the mapping without being added initially.*

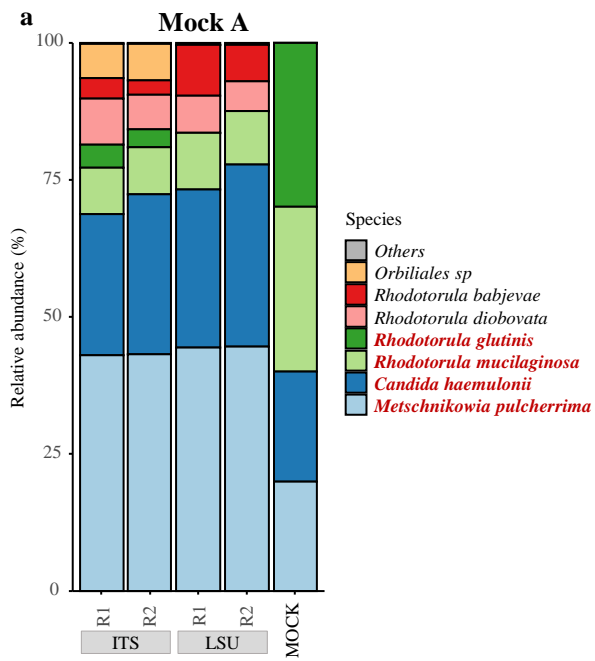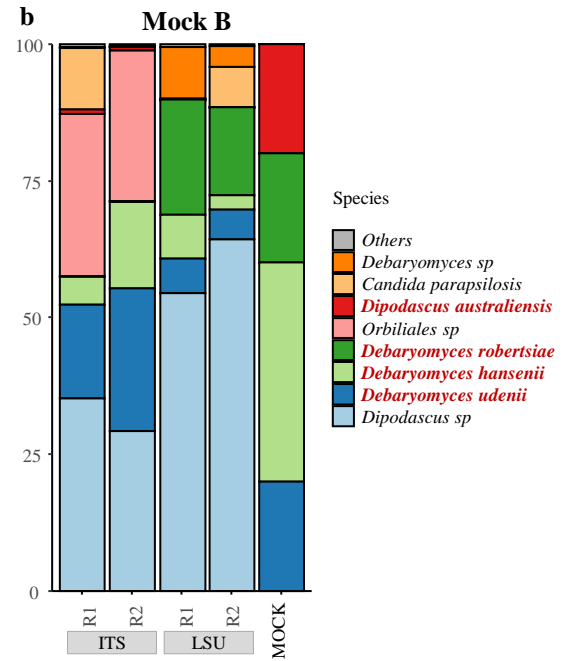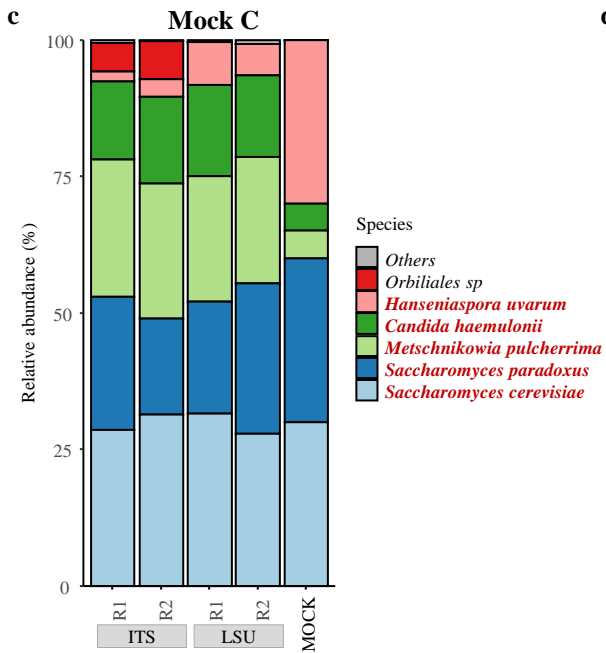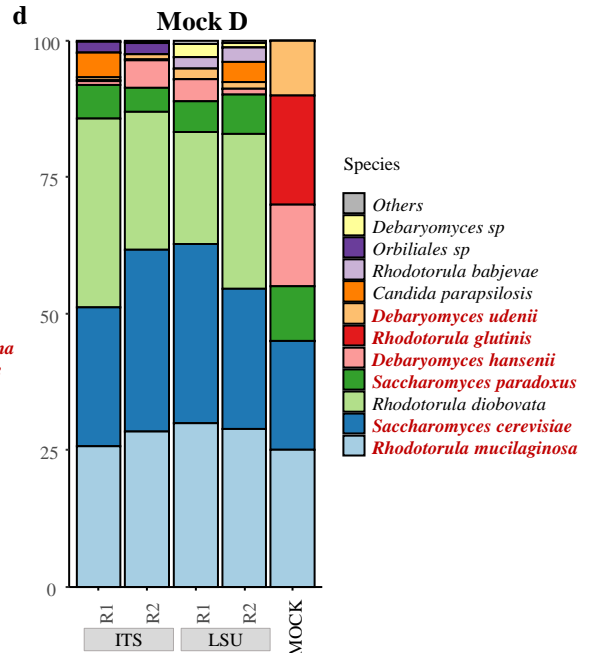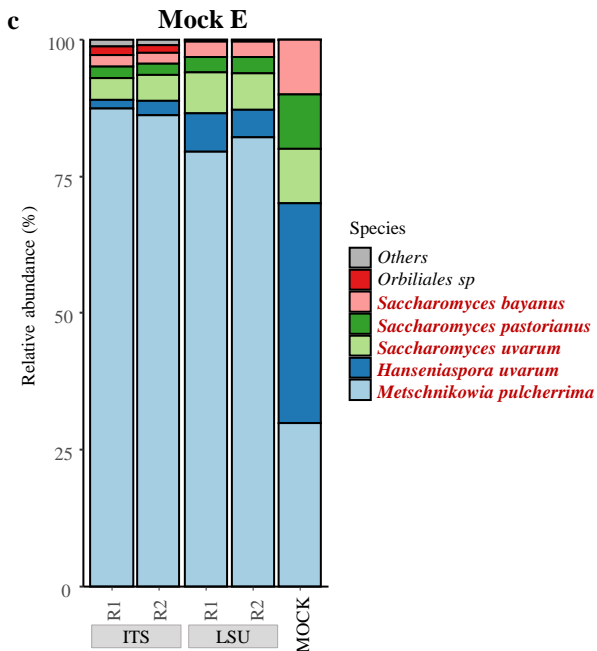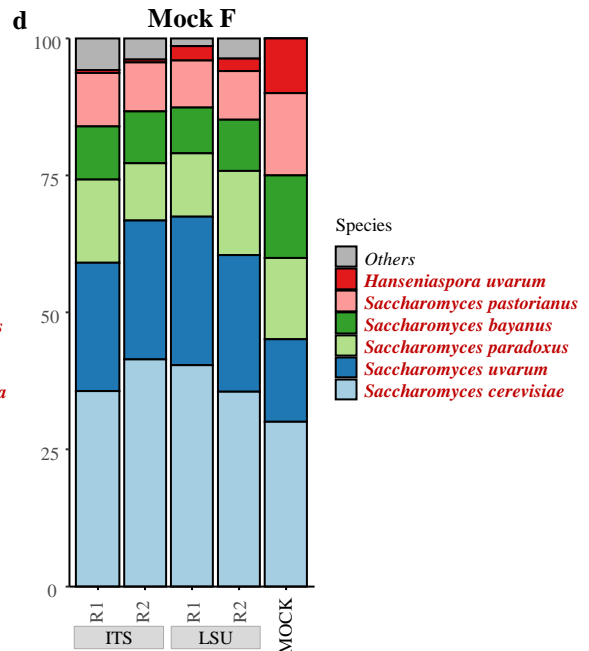

**Supplementary table 1: distance matrix of the species included in the mock communities**

Phylogenetic relationships among the species used in the experiment

|                                  | <i>Candida haemulonii</i> | <i>Debaryomyces hansenii</i> | <i>Debaryomyces robertsiae</i> | <i>Debaryomyces sp</i> | <i>Debaryomyces udonii</i> | <i>Dipodascus australiensis</i> | <i>Dipodascus sp</i> | <i>Hanseniaspora uvarum</i> | <i>Metschnikowia hawaiiensis</i> | <i>Metschnikowia pulcherrima</i> | <i>Rhodotorula glutinis</i> | <i>Rhodotorula mucilaginosa</i> | <i>Saccharomyces bayanus</i> | <i>Saccharomyces cerevisiae</i> | <i>Saccharomyces paradoxus</i> | <i>Saccharomyces pastorianus</i> | <i>Saccharomyces uvarum</i> |
|----------------------------------|---------------------------|------------------------------|--------------------------------|------------------------|----------------------------|---------------------------------|----------------------|-----------------------------|----------------------------------|----------------------------------|-----------------------------|---------------------------------|------------------------------|---------------------------------|--------------------------------|----------------------------------|-----------------------------|
| <i>Candida haemulonii</i>        | 0.0%                      | 17.2%                        | 16.7%                          | 16.7%                  | 16.7%                      | 24.2%                           | 28.3%                | 22.7%                       | 28.8%                            | 15.7%                            | 29.3%                       | 28.8%                           | 21.2%                        | 21.2%                           | 21.2%                          | 21.2%                            | 21.2%                       |
| <i>Debaryomyces hansenii</i>     | 17.2%                     | 0.0%                         | 1.0%                           | 0.5%                   | 1.0%                       | 27.8%                           | 21.2%                | 15.2%                       | 26.8%                            | 20.2%                            | 23.7%                       | 23.7%                           | 9.6%                         | 9.6%                            | 9.6%                           | 9.6%                             | 9.6%                        |
| <i>Debaryomyces robertsiae</i>   | 16.7%                     | 1.0%                         | 0.0%                           | 0.5%                   | 0.0%                       | 28.3%                           | 20.7%                | 15.2%                       | 26.8%                            | 19.7%                            | 22.7%                       | 23.7%                           | 9.6%                         | 9.6%                            | 9.6%                           | 9.6%                             | 9.6%                        |
| <i>Debaryomyces sp</i>           | 16.7%                     | 0.5%                         | 0.5%                           | 0.0%                   | 0.5%                       | 28.3%                           | 21.2%                | 15.7%                       | 27.3%                            | 19.7%                            | 23.2%                       | 23.7%                           | 10.1%                        | 10.1%                           | 10.1%                          | 10.1%                            | 10.1%                       |
| <i>Debaryomyces udonii</i>       | 16.7%                     | 1.0%                         | 0.0%                           | 0.5%                   | 0.0%                       | 28.3%                           | 20.7%                | 15.2%                       | 26.8%                            | 19.7%                            | 22.7%                       | 23.7%                           | 9.6%                         | 9.6%                            | 9.6%                           | 9.6%                             | 9.6%                        |
| <i>Dipodascus australiensis</i>  | 24.2%                     | 27.8%                        | 28.3%                          | 28.3%                  | 28.3%                      | 0.0%                            | 24.2%                | 27.3%                       | 33.3%                            | 24.8%                            | 33.8%                       | 32.3%                           | 27.3%                        | 27.3%                           | 27.3%                          | 27.3%                            | 27.3%                       |
| <i>Dipodascus sp</i>             | 28.3%                     | 21.2%                        | 20.7%                          | 21.2%                  | 20.7%                      | 24.2%                           | 0.0%                 | 23.7%                       | 26.8%                            | 29.8%                            | 28.3%                       | 29.8%                           | 23.7%                        | 23.7%                           | 23.7%                          | 23.7%                            | 23.7%                       |
| <i>Hanseniaspora uvarum</i>      | 22.7%                     | 15.2%                        | 15.2%                          | 15.7%                  | 15.2%                      | 27.3%                           | 23.7%                | 0.0%                        | 26.8%                            | 22.2%                            | 24.8%                       | 24.2%                           | 12.1%                        | 12.1%                           | 12.1%                          | 12.1%                            | 12.1%                       |
| <i>Metschnikowia hawaiiensis</i> | 28.8%                     | 26.8%                        | 26.8%                          | 27.3%                  | 26.8%                      | 33.3%                           | 26.8%                | 26.8%                       | 0.0%                             | 27.8%                            | 34.9%                       | 33.8%                           | 26.8%                        | 26.8%                           | 26.8%                          | 26.8%                            | 26.8%                       |
| <i>Metschnikowia pulcherrima</i> | 15.7%                     | 20.2%                        | 19.7%                          | 19.7%                  | 19.7%                      | 24.8%                           | 29.8%                | 22.2%                       | 27.8%                            | 0.0%                             | 27.8%                       | 28.3%                           | 21.7%                        | 21.7%                           | 21.7%                          | 21.7%                            | 21.7%                       |
| <i>Rhodotorula glutinis</i>      | 29.3%                     | 23.7%                        | 22.7%                          | 23.2%                  | 22.7%                      | 33.8%                           | 28.3%                | 24.8%                       | 34.9%                            | 27.8%                            | 0.0%                        | 7.1%                            | 21.7%                        | 21.7%                           | 21.7%                          | 21.7%                            | 21.7%                       |
| <i>Rhodotorula mucilaginosa</i>  | 28.8%                     | 23.7%                        | 23.7%                          | 23.7%                  | 23.7%                      | 32.3%                           | 29.8%                | 24.2%                       | 33.8%                            | 28.3%                            | 7.1%                        | 0.0%                            | 21.7%                        | 21.7%                           | 21.7%                          | 21.7%                            | 21.7%                       |
| <i>Saccharomyces bayanus</i>     | 21.2%                     | 9.6%                         | 9.6%                           | 10.1%                  | 9.6%                       | 27.3%                           | 23.7%                | 12.1%                       | 26.8%                            | 21.7%                            | 21.7%                       | 21.7%                           | 0.0%                         | 0.0%                            | 0.0%                           | 0.0%                             | 0.0%                        |
| <i>Saccharomyces cerevisiae</i>  | 21.2%                     | 9.6%                         | 9.6%                           | 10.1%                  | 9.6%                       | 27.3%                           | 23.7%                | 12.1%                       | 26.8%                            | 21.7%                            | 21.7%                       | 21.7%                           | 0.0%                         | 0.0%                            | 0.0%                           | 0.0%                             | 0.0%                        |
| <i>Saccharomyces paradoxus</i>   | 21.2%                     | 9.6%                         | 9.6%                           | 10.1%                  | 9.6%                       | 27.3%                           | 23.7%                | 12.1%                       | 26.8%                            | 21.7%                            | 21.7%                       | 21.7%                           | 0.0%                         | 0.0%                            | 0.0%                           | 0.0%                             | 0.0%                        |
| <i>Saccharomyces pastorianus</i> | 21.2%                     | 9.6%                         | 9.6%                           | 10.1%                  | 9.6%                       | 27.3%                           | 23.7%                | 12.1%                       | 26.8%                            | 21.7%                            | 21.7%                       | 21.7%                           | 0.0%                         | 0.0%                            | 0.0%                           | 0.0%                             | 0.0%                        |
| <i>Saccharomyces uvarum</i>      | 21.2%                     | 9.6%                         | 9.6%                           | 10.1%                  | 9.6%                       | 27.3%                           | 23.7%                | 12.1%                       | 26.8%                            | 21.7%                            | 21.7%                       | 21.7%                           | 0.0%                         | 0.0%                            | 0.0%                           | 0.0%                             | 0.0%                        |



**Supplementary Table 2. MinION BioSample accessions**

*IDs of MinION sequences stored in SRA database for identifying each sample (BioProject ID PRJNA862129)*

| <b>Accession</b> | <b>Sample Name</b> | <b>Organism</b>      |
|------------------|--------------------|----------------------|
| SAMN29939597     | Mock_A_1_I         | synthetic metagenome |
| SAMN29939598     | Mock_A_1_II        | synthetic metagenome |
| SAMN29939599     | Mock_A_1_III       | synthetic metagenome |
| SAMN29939600     | Mock_A_2_I         | synthetic metagenome |
| SAMN29939601     | Mock_A_2_II        | synthetic metagenome |
| SAMN29939602     | Mock_A_2_III       | synthetic metagenome |
| SAMN29939603     | Mock_B_1_I         | synthetic metagenome |
| SAMN29939604     | Mock_B_1_II        | synthetic metagenome |
| SAMN29939605     | Mock_B_1_III       | synthetic metagenome |
| SAMN29939606     | Mock_B_2_I         | synthetic metagenome |
| SAMN29939607     | Mock_B_2_II        | synthetic metagenome |
| SAMN29939608     | Mock_B_2_III       | synthetic metagenome |
| SAMN29939609     | Mock_C_1_I         | synthetic metagenome |
| SAMN29939610     | Mock_C_1_II        | synthetic metagenome |
| SAMN29939611     | Mock_C_1_III       | synthetic metagenome |
| SAMN29939612     | Mock_C_2_I         | synthetic metagenome |
| SAMN29939613     | Mock_C_2_II        | synthetic metagenome |
| SAMN29939614     | Mock_C_2_III       | synthetic metagenome |
| SAMN29939615     | Mock_D_1_I         | synthetic metagenome |
| SAMN29939616     | Mock_D_1_II        | synthetic metagenome |
| SAMN29939617     | Mock_D_1_III       | synthetic metagenome |
| SAMN29939618     | Mock_D_2_I         | synthetic metagenome |
| SAMN29939619     | Mock_D_2_II        | synthetic metagenome |
| SAMN29939620     | Mock_D_2_III       | synthetic metagenome |
| SAMN29939621     | Mock_E_1_I         | synthetic metagenome |
| SAMN29939622     | Mock_E_1_II        | synthetic metagenome |
| SAMN29939623     | Mock_E_1_III       | synthetic metagenome |
| SAMN29939624     | Mock_E_2_I         | synthetic metagenome |
| SAMN29939625     | Mock_E_2_II        | synthetic metagenome |
| SAMN29939626     | Mock_E_2_III       | synthetic metagenome |
| SAMN29939627     | Mock_F_1_I         | synthetic metagenome |
| SAMN29939628     | Mock_F_1_II        | synthetic metagenome |

|              |              |                      |
|--------------|--------------|----------------------|
| SAMN29939629 | Mock_F_1_III | synthetic metagenome |
| SAMN29939630 | Mock_F_2_I   | synthetic metagenome |
| SAMN29939631 | Mock_F_2_II  | synthetic metagenome |
| SAMN29939632 | Mock_F_2_III | synthetic metagenome |

---

**Supplementary Table 3. Illumina MiSeq BioSample accessions**

*IDs of MiSeq sequences stored in SRA database for identifying each sample (BioProject ID PRJNA862334)*

| <b>Accession</b> | <b>Sample Name</b> | <b>Organism</b>      |
|------------------|--------------------|----------------------|
| SAMN29967857     | A1_T1_R1           | synthetic metagenome |
| SAMN29967858     | A1_T1_R2           | synthetic metagenome |
| SAMN29967859     | A1_T2_R1           | synthetic metagenome |
| SAMN29967860     | A1_T2_R2           | synthetic metagenome |
| SAMN29967861     | A1_T3_R1           | synthetic metagenome |
| SAMN29967862     | A1_T3_R2           | synthetic metagenome |
| SAMN29967863     | A2_T1_R1           | synthetic metagenome |
| SAMN29967864     | A2_T1_R2           | synthetic metagenome |
| SAMN29967865     | A2_T2_R1           | synthetic metagenome |
| SAMN29967866     | A2_T2_R2           | synthetic metagenome |
| SAMN29967867     | A2_T3_R1           | synthetic metagenome |
| SAMN29967868     | A2_T3_R2           | synthetic metagenome |
| SAMN29967869     | B1_T1_R1           | synthetic metagenome |
| SAMN29967870     | B1_T1_R2           | synthetic metagenome |
| SAMN29967871     | B1_T2_R1           | synthetic metagenome |
| SAMN29967872     | B1_T2_R2           | synthetic metagenome |
| SAMN29967873     | B1_T3_R1           | synthetic metagenome |
| SAMN29967874     | B1_T3_R2           | synthetic metagenome |
| SAMN29967875     | B2_T1_R1           | synthetic metagenome |
| SAMN29967876     | B2_T1_R2           | synthetic metagenome |
| SAMN29967877     | B2_T2_R1           | synthetic metagenome |
| SAMN29967878     | B2_T2_R2           | synthetic metagenome |
| SAMN29967879     | B2_T3_R1           | synthetic metagenome |
| SAMN29967880     | B2_T3_R2           | synthetic metagenome |
| SAMN29967881     | C1_T1_R1           | synthetic metagenome |
| SAMN29967882     | C1_T1_R2           | synthetic metagenome |
| SAMN29967883     | C1_T2_R1           | synthetic metagenome |
| SAMN29967884     | C1_T2_R2           | synthetic metagenome |
| SAMN29967885     | C1_T3_R1           | synthetic metagenome |
| SAMN29967886     | C1_T3_R2           | synthetic metagenome |
| SAMN29967887     | C2_T1_R1           | synthetic metagenome |
| SAMN29967888     | C2_T1_R2           | synthetic metagenome |
| SAMN29967889     | C2_T2_R1           | synthetic metagenome |
| SAMN29967890     | C2_T2_R2           | synthetic metagenome |
| SAMN29967891     | C2_T3_R1           | synthetic metagenome |

|              |          |                      |
|--------------|----------|----------------------|
| SAMN29967892 | C2_T3_R2 | synthetic metagenome |
| SAMN29967893 | D1_T1_R1 | synthetic metagenome |
| SAMN29967894 | D1_T1_R2 | synthetic metagenome |
| SAMN29967895 | D1_T2_R1 | synthetic metagenome |
| SAMN29967896 | D1_T2_R2 | synthetic metagenome |
| SAMN29967897 | D1_T3_R1 | synthetic metagenome |
| SAMN29967898 | D1_T3_R2 | synthetic metagenome |
| SAMN29967899 | D2_T1_R1 | synthetic metagenome |
| SAMN29967900 | D2_T1_R2 | synthetic metagenome |
| SAMN29967901 | D2_T2_R1 | synthetic metagenome |
| SAMN29967902 | D2_T2_R2 | synthetic metagenome |
| SAMN29967903 | D2_T3_R1 | synthetic metagenome |
| SAMN29967904 | D2_T3_R2 | synthetic metagenome |
| SAMN29967905 | E1_T1_R1 | synthetic metagenome |
| SAMN29967906 | E1_T1_R2 | synthetic metagenome |
| SAMN29967907 | E1_T2_R1 | synthetic metagenome |
| SAMN29967908 | E1_T2_R2 | synthetic metagenome |
| SAMN29967909 | E1_T3_R1 | synthetic metagenome |
| SAMN29967910 | E1_T3_R2 | synthetic metagenome |
| SAMN29967911 | E2_T1_R1 | synthetic metagenome |
| SAMN29967912 | E2_T1_R2 | synthetic metagenome |
| SAMN29967913 | E2_T2_R1 | synthetic metagenome |
| SAMN29967914 | E2_T2_R2 | synthetic metagenome |
| SAMN29967915 | E2_T3_R1 | synthetic metagenome |
| SAMN29967916 | E2_T3_R2 | synthetic metagenome |
| SAMN29967917 | F1_T1_R1 | synthetic metagenome |
| SAMN29967918 | F1_T1_R2 | synthetic metagenome |
| SAMN29967919 | F1_T2_R1 | synthetic metagenome |
| SAMN29967920 | F1_T2_R2 | synthetic metagenome |
| SAMN29967921 | F1_T3_R1 | synthetic metagenome |
| SAMN29967922 | F1_T3_R2 | synthetic metagenome |
| SAMN29967923 | F2_T1_R1 | synthetic metagenome |
| SAMN29967924 | F2_T1_R2 | synthetic metagenome |
| SAMN29967925 | F2_T2_R1 | synthetic metagenome |
| SAMN29967926 | F2_T2_R2 | synthetic metagenome |
| SAMN29967927 | F2_T3_R1 | synthetic metagenome |
| SAMN29967928 | F2_T3_R2 | synthetic metagenome |

---

**Supplementary Table 4. Reference sequences length of organisms included in mock communities the most common ghosts**

| Species                                                   | Length of reference sequence in UNITE (bp) |
|-----------------------------------------------------------|--------------------------------------------|
| <i>Orbiliales_sp</i>  UDB014954 SH1654757.08FU            | 1390                                       |
| <i>Nakaseomyces_sp</i>  MF767857 SH1505584.08FU           | 1360                                       |
| <i>Glaciozyma_sp</i>  LC493225 SH2711413.08FU             | 1193                                       |
| <i>Saccharomyces_paradoxus</i>  AJ229059 SH2466103.08FU   | 766                                        |
| <i>Saccharomyces_bayanus</i>  KJ707146 SH1613179.08FU     | 758                                        |
| <i>Hanseniaspora_uvarum</i>  AJ271031 SH1921544.08FU      | 710                                        |
| <i>Debaryomyces_hansenii</i>  AB053101 SH2154634.08FU     | 576                                        |
| <i>Debaryomyces_udenii</i>  JN942656 SH1516594.08FU       | 550                                        |
| <i>Debaryomyces_robertsiae</i>  AB054019 SH1676795.08FU   | 576                                        |
| <i>Rhodotorula_mucilaginosa</i>  KJ706479 SH1558748.08FU  | 558                                        |
| <i>Rhodotorula_diobovata</i>  MH753702 SH1558776.08FU     | 539                                        |
| <i>Dipodascus_sp</i>  MG776363 SH2708874.08FU             | 294                                        |
| <i>Metschnikowia_pulcherrima</i>  KY104205 SH2751425.08FU | 294                                        |
| <i>Metschnikowia_sp</i>  KY197816 SH3341279.08FU          | 479                                        |
| <i>Candida_haemulonis</i>  AY500375 SH1555159.08FU        | 285                                        |
